# Supplementary material for: Malignant Pleural Mesothelioma: Preliminary Toxicity Results of Adjuvant Radiotherapy Hypofractionation in a Prospective Trial (MESO-RT)
Source: MDPI journal article supplement (doi:10.3390/cancers15041057), 2023-02-07
Supplement: s1 [file s1]

## Supplementary Materials - Raw data

**Supplementary Table S1.** Lung and other Organs at Risk (OAR) constraints.

|             | Total Lung |         |        |           |             | Contralateral Lung |         |        |           |
|-------------|------------|---------|--------|-----------|-------------|--------------------|---------|--------|-----------|
|             | NTCP (%)   | V20 (%) | V5 (%) | Mean (Gy) |             | NTCP (%)           | V20 (%) | V5 (%) | Mean (Gy) |
| <b>Mean</b> | 13,11      | 32,72   | 40,56  | 17,71     | <b>Mean</b> | 0,456              | 0,454   | 3,502  | 2,109     |
| <b>Max</b>  | 24,69      | 42,38   | 52,75  | 22,95     | <b>Max</b>  | 0,477              | 1,41    | 6,03   | 2,47      |
| <b>Min</b>  | 6,47       | 26,18   | 22,77  | 13,47     | <b>Min</b>  | 0,41               | 0       | 1,46   | 1,29      |

|             | Other Organs at Risk     |                             |                         |                    |                           |                       |                  |
|-------------|--------------------------|-----------------------------|-------------------------|--------------------|---------------------------|-----------------------|------------------|
|             | Spinal Cord<br>Dmax (Gy) | Esophagus Mean<br>Dose (Gy) | Liver Mean<br>Dose (Gy) | Bowel<br>Dmax (Gy) | Stomach Mean<br>Dose (Gy) | Kidney OMO<br>V18 (%) | Heart<br>V30 (%) |
| <b>Mean</b> | 17,8                     | 15                          | 9,94                    | 31,07              | 7,01                      | 6,4                   | 14,48            |
| <b>Std</b>  | 2,02                     | 3,6                         | 6,9                     | 18,31              | 5,88                      | 8,12                  | 5,93             |
| <b>Max</b>  | 22,85                    | 22,07                       | 24,29                   | 56,13              | 30,52                     | 37,8                  | 25,78            |
| <b>Min</b>  | 14,88                    | 6,52                        | 1,94                    | 3,19               | 2,59                      | 0                     | 2,12             |

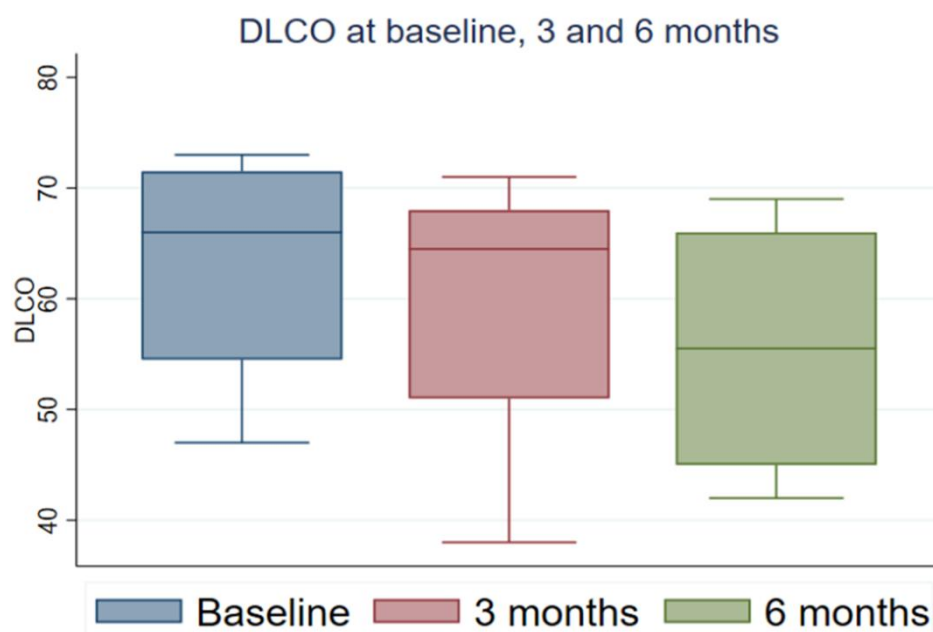

**Supplementary Figure S1.** Graph of DLCO at baseline, 3 months and 6 months after radiotherapy.

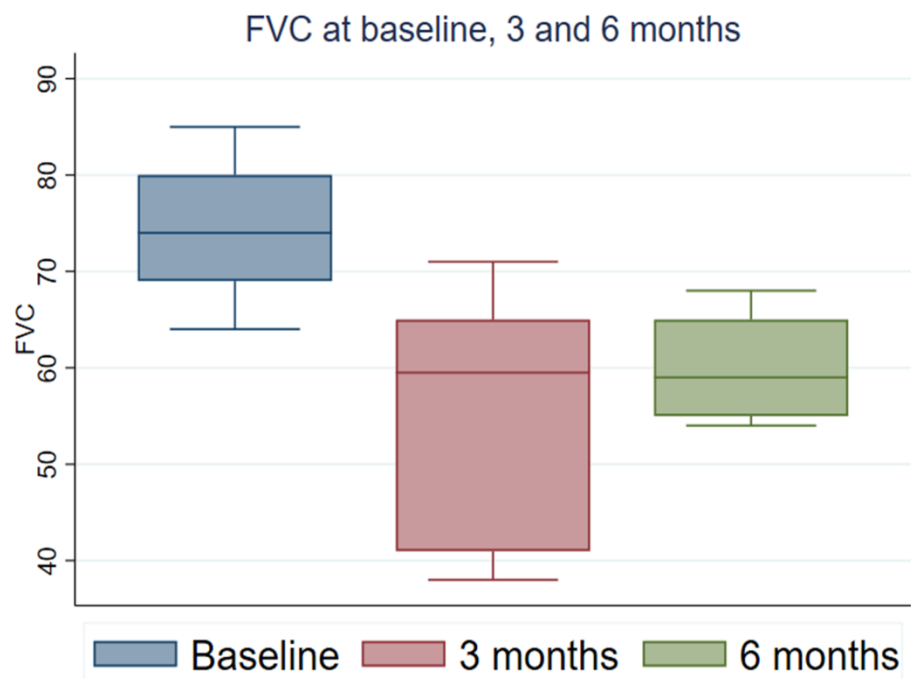

**Supplementary Figure S2.** Graph of FVC at baseline, 3 months and 6 months after radiotherapy.

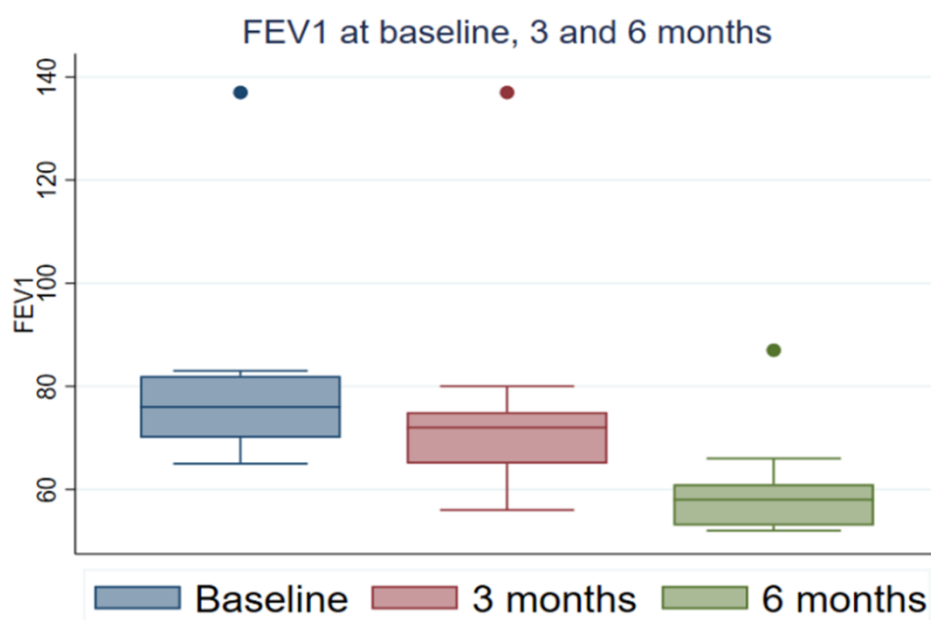

**Supplementary Figure S3.** Graph of FEV1 at baseline, 3 months and 6 months after radiotherapy.

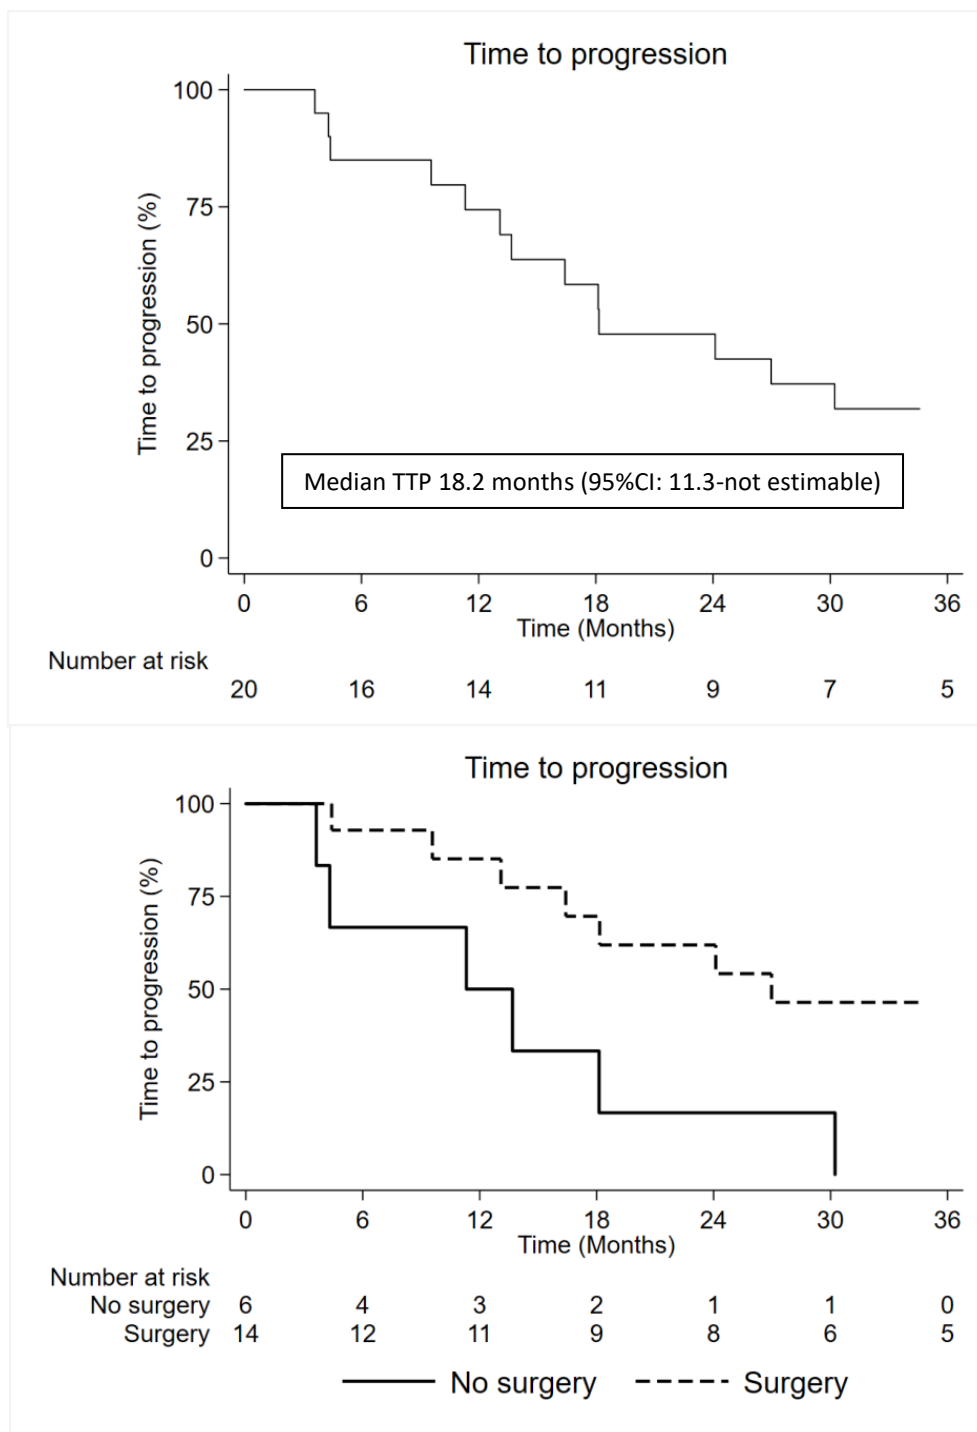

**Supplementary Figure S4. (A)** Graph of Time to Progression of all patients; **(B)** Graph of time To Progression of operated patients and no-operated patients.
